# Supplementary material
Source: Springer Nature journal article supplement (https://www.springermedizin.de/resource/supplementary/12882_2011_273_MOESM2_ESM.pdf/9453530)

**A.**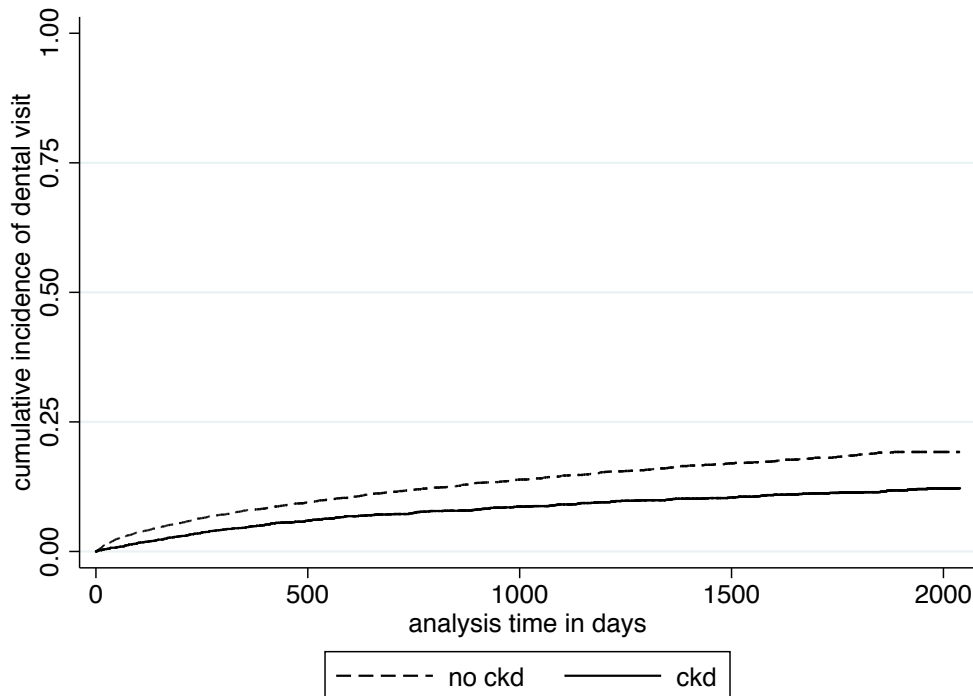**B.**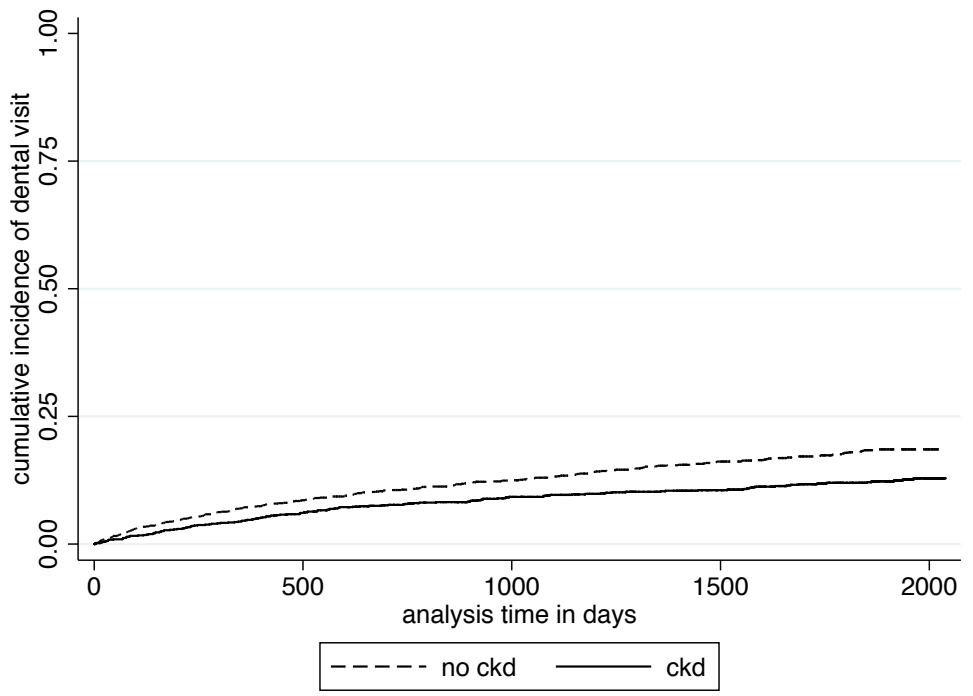

Supplement: MOESM2 [file 9453530]
